# Supplementary material for: The Polycomb group protein Ring1 regulates dorsoventral patterning of the mouse telencephalon
Source: PubMed Central journal article supplement (PMC7658352; doi:10.1038/s41467-020-19556-5), 2020-11-11
Supplement: 41467_2020_19556_MOESM1_ESM.pdf [file 41467_2020_19556_MOESM1_ESM.pdf]

Supplementary Information

**The Polycomb group protein Ring1 regulates dorsoventral patterning  
of the mouse telencephalon**

Eto et al.

Supplementary Fig. 1

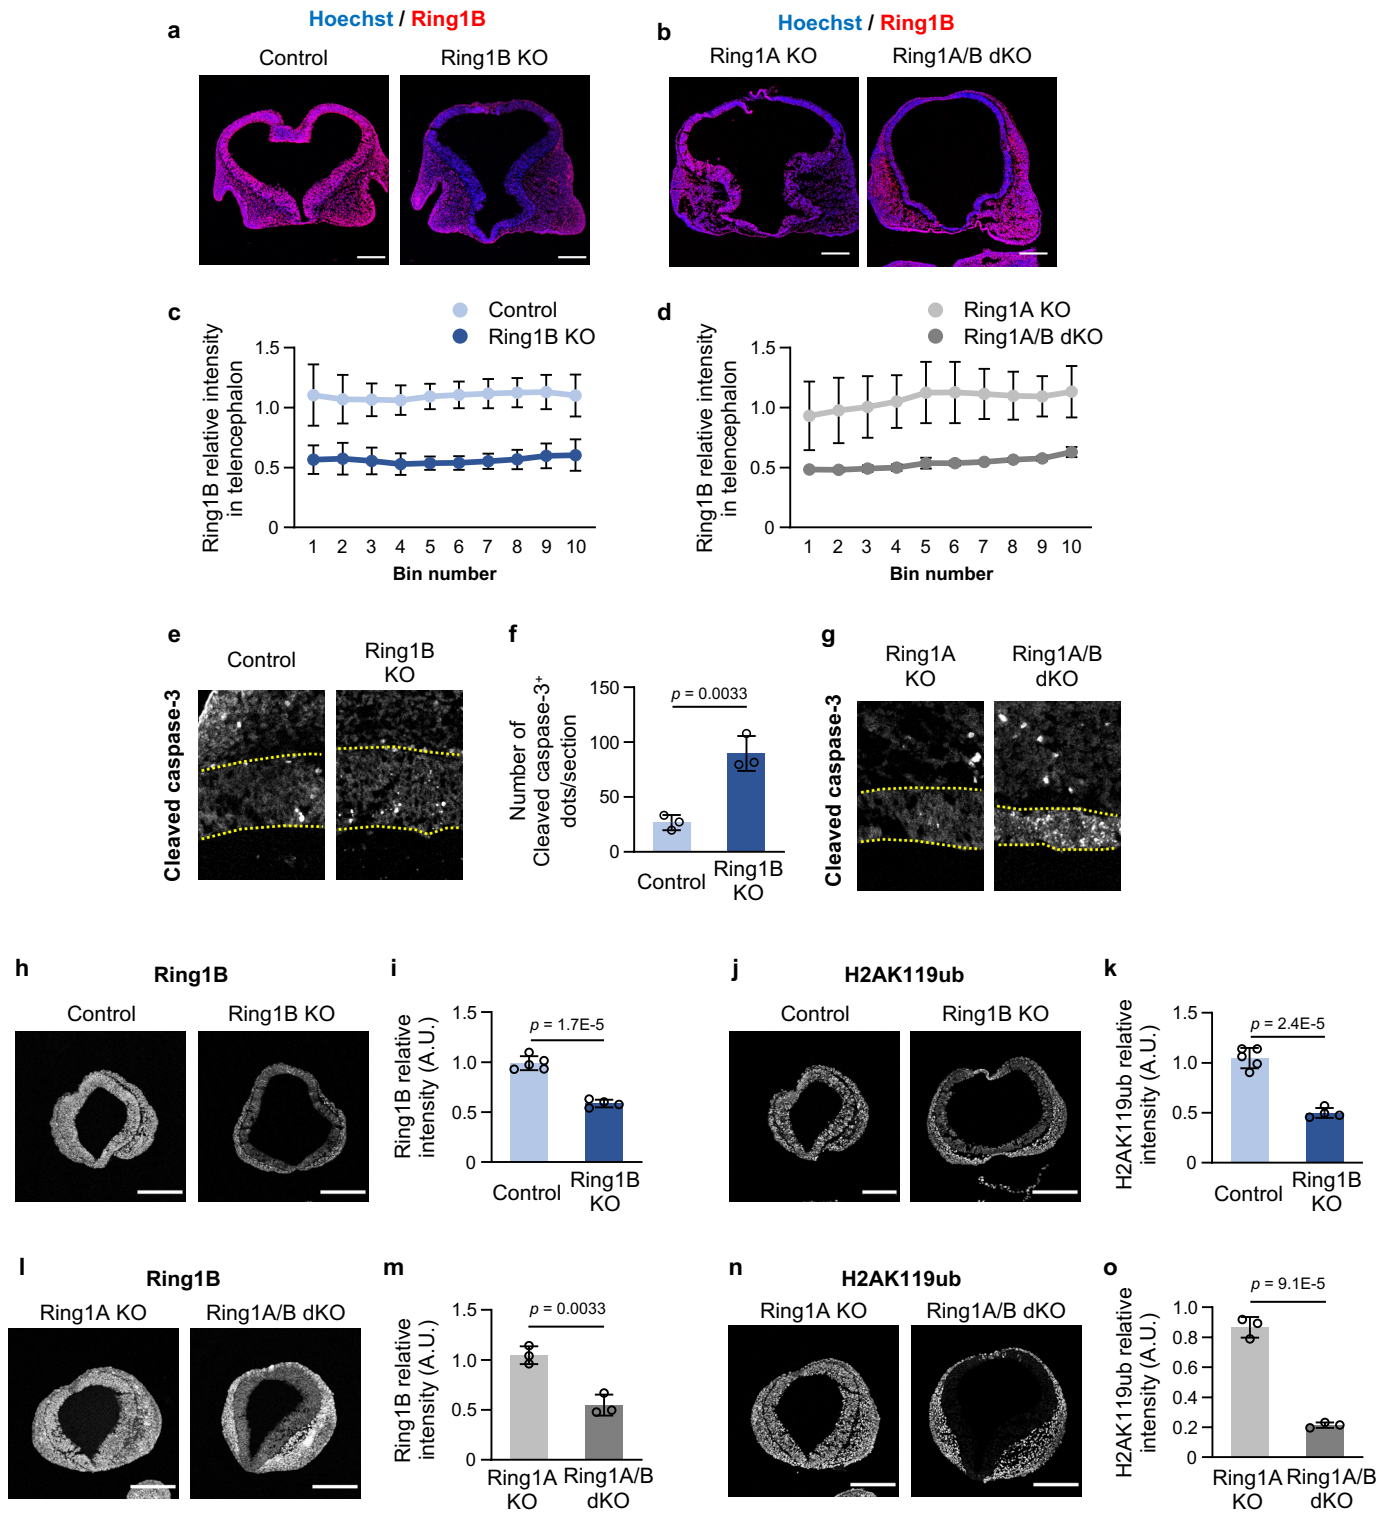

**Supplementary Fig. 1 Deletion of *Ring1b* in neural tissue attenuates the expression and function of Ring1B as well as induces apoptosis in the early-stage telencephalon. a, b, h, j, l, n** Coronal sections of the brain of control and Ring1B KO mice (**a, h, j**) or of Ring1A KO and Ring1A/B dKO mice (**b, l, n**) at E10 (**a, b**) or E9 (**h, j, l, n**) were subjected to immunohistofluorescence staining with antibodies to Ring1B (**a, b, h, l**) or H2AK119ub (**j, n**). Nuclei were counterstained with Hoechst 33342 (**a, b**). Scale bars, 200  $\mu\text{m}$ . **c, d** Quantification of immunostaining intensity for Ring1B in images similar to those in **a** and **b**, respectively. The telencephalic wall was divided into 10 bins, from 1 (dorsal) to 10 (ventral), and the ratio of the average intensity of Ring1B in each bin to that for nonneural tissue adjacent to the ventral telencephalon was determined. Data are means  $\pm$  s.d., n=3 embryos of each genotype. **e, g** Coronal sections of the brain of control and Ring1B KO mice (**e**) or of Ring1A KO and Ring1A/B dKO mice (**g**) at E10 were subjected to immunohistofluorescence staining with antibodies to cleaved caspase-3. A region (200 by 300  $\mu\text{m}$ ) of the ventral telencephalon is shown for each genotype. The telencephalic wall is demarcated by the yellow dotted lines. **f** The average number of cleaved caspase-3 signals in the control and Ring1B KO mouse telencephalon was determined for images as in **e**. Data are means  $\pm$  s.d., n=3 embryos of each genotype, two-tailed Student's unpaired *t* test. **i, k, m, o** The ratio of the average immunostaining intensity of Ring1B (**i, m**) or H2AK119ub (**k, o**) for the entire telencephalon to that for nonneural tissue adjacent to the ventral telencephalon was determined for images similar to those in **h, j, l** and **n**, respectively. Data are means  $\pm$  s.d., n=3 embryos of each genotype, two-tailed Student's unpaired *t* test. Source data are provided as a Source Data file.

Supplementary Fig. 2

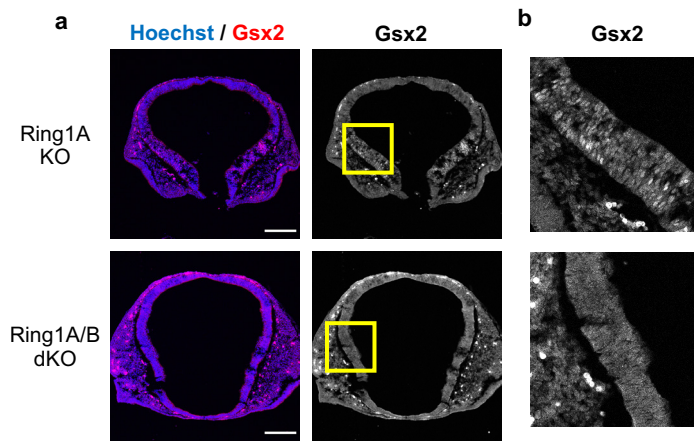

**Supplementary Fig. 2 Deletion of *Ring1* attenuates expression of the LGE-specific TF *Gsx2*.**

Coronal sections of the brain of Ring1A KO or Ring1A/B dKO mice at E10 were subjected to immunohistofluorescence staining with antibodies to Gsx2. Nuclei were counterstained with Hoechst 33342. The regions indicated with yellow outlined squares (300 by 300  $\mu\text{m}$ ) in **a** are shown at higher magnification in **b**. Representative images from n=3 embryos of each genotype are shown. Scale bars, 200  $\mu\text{m}$ .

Supplementary Fig. 3

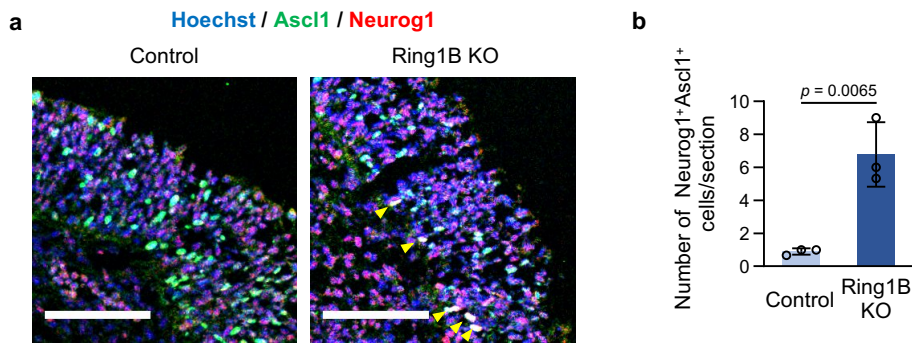

**Supplementary Fig. 3. Deletion of *Ring1b* increases the number of Neurog1<sup>+</sup>Ascl1<sup>+</sup> cells in the ventral telencephalon.** **a** Higher magnification views of the regions indicated with yellow outlined squares in Fig. 3a. Yellow arrowheads indicate Neurog1<sup>+</sup>Ascl1<sup>+</sup> cells. Scale bars, 100  $\mu$ m. **b** Average number of Neurog1<sup>+</sup>Ascl1<sup>+</sup> cells in the control and Ring1B KO mouse telencephalon determined from images similar to those in **a**. Data are means  $\pm$  s.d., n=3 embryos of each genotype, two-tailed Student's unpaired *t* test. Source data are provided as a Source Data file.

Supplementary Fig. 4

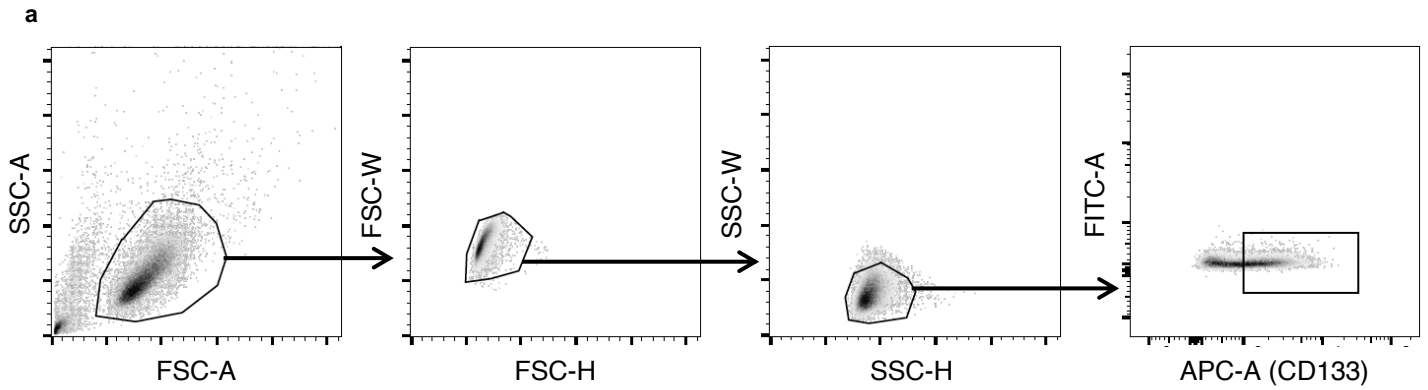

**b**

| Up-regulated genes in Hippo signaling pathway | <i>p</i> value |
|-----------------------------------------------|----------------|
| <i>Tgfb2</i>                                  | 2.88E-11       |
| <i>Ppp2r2b</i>                                | 2.38E-08       |
| <i>Wnt8b</i>                                  | 1.90E-05       |
| <i>Fzd1</i>                                   | 3.88E-05       |
| <i>Snai2</i>                                  | 5.43E-05       |
| <i>Fzd6</i>                                   | 1.14E-04       |
| <i>Bmp7</i>                                   | 1.45E-04       |
| <i>Bmp5</i>                                   | 1.57E-04       |
| <i>Tgfr2</i>                                  | 3.17E-04       |
| <i>Tcf7</i>                                   | 3.28E-04       |
| <i>Tgfb3</i>                                  | 5.80E-04       |
| <i>Ctgf</i>                                   | 1.29E-03       |
| <i>Wnt7b</i>                                  | 1.51E-03       |
| <i>Lgl2</i>                                   | 2.27E-03       |
| <i>Axin2</i>                                  | 3.68E-03       |
| <i>Tead4</i>                                  | 3.71E-03       |
| <i>Wnt5b</i>                                  | 7.79E-03       |
| <i>Id1</i>                                    | 1.24E-02       |

**c**

| Up-regulated BMP and Wnt ligand genes | Average RPKM Control | Average RPKM Ring1B KO | <i>p</i> value |
|---------------------------------------|----------------------|------------------------|----------------|
| <i>Bmp5</i>                           | 2.50                 | 10.14                  | 1.57E-04       |
| <i>Bmp6</i>                           | 1.32                 | 3.96                   | 4.66E-02       |
| <i>Bmp7</i>                           | 4.38                 | 15.54                  | 1.45E-04       |
| <i>Wnt5b</i>                          | 20.62                | 37.98                  | 7.79E-03       |
| <i>Wnt7b</i>                          | 159.45               | 277.73                 | 1.51E-03       |
| <i>Wnt8b</i>                          | 14.53                | 41.65                  | 1.90E-05       |

BMP ligand genes  
 Wnt ligand genes

BMP-related  
 Wnt-related

**Supplementary Fig. 4 Up-regulated genes related to the Hippo signaling pathway and fold change in BMP and Wnt ligand gene expression in ventral NPCs of Ring1B KO embryos.** **a** Gating strategies used to sort CD133<sup>high</sup> cells from dissected telecephalon at E11 on Fig. 2g, 4, 6a, b, 9 and Supplementary Fig. 8. **b** Up-regulated genes categorized to the Hippo signaling pathway for the RNA-seq analysis shown in Fig. 4 include genes related to BMP signaling (highlighted in yellow) or to Wnt signaling (highlighted in green). **c** BMP and Wnt ligand genes that showed a higher level of expression in Ring1B KO embryos than in control embryos for each of the three RNA-seq experiments shown in Fig. 4. Averages of the RPKM scores for n=3 control and Ring1B KO samples and the corresponding *p* values determined with edgeR are listed.

Supplementary Fig. 5

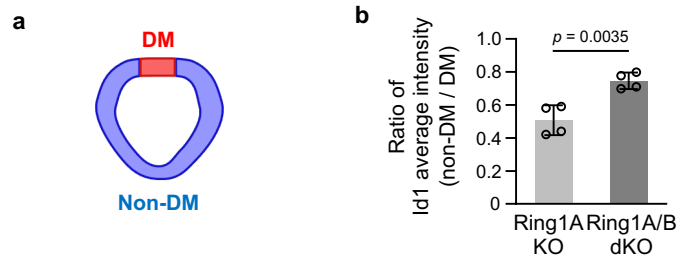

**Supplementary Fig. 5 Deletion of *Ring1b* up-regulates Id1 protein expression in the telencephalon outside of the dorsal midline at E9.** **a** Immunohistofluorescence signals of Id1 in the dorsal midline (DM) and the non-DM portion of the neuroepithelium were measured in coronal sections of the Ring1A KO and Ring1A/B dKO telencephalon at E9. **b** Ratio of Id1 average intensity in the non-DM region to that in DM. Data are means  $\pm$  s.d., n=4 mice of each genotype from three litters, two-tailed Student's unpaired *t* test. Source data are provided as a Source Data file.

Supplementary Fig. 6

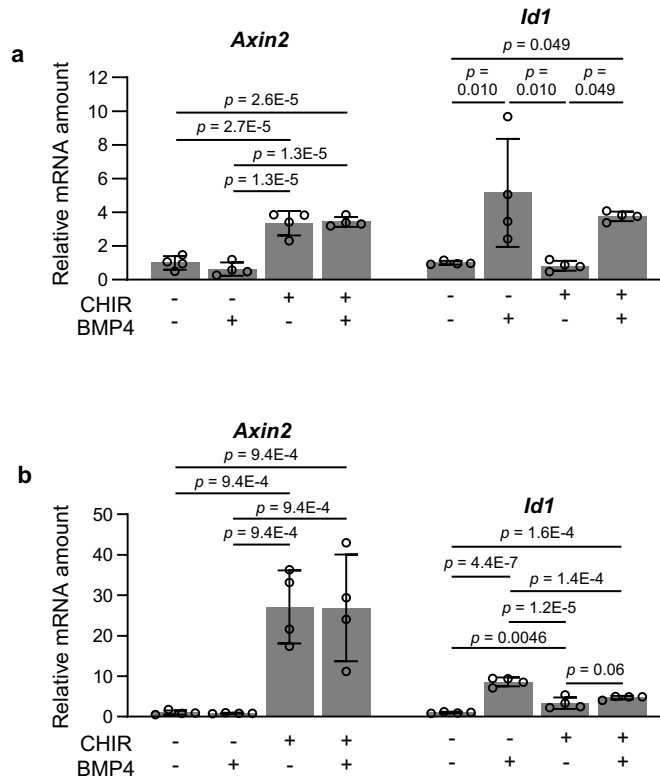

**Supplementary Fig. 6 Effects of Wnt and BMP signaling on *Axin2* and *Id1* expression in cultured NPCs of the early-stage telencephalon.** The telencephalon of WT (ICR) mice at E9 was maintained in explant (a) or monolayer (b) culture for 6 h before exposure for an additional 24 h to BMP4 (50 ng/ml) or 5  $\mu$ M CHIR-99021. Relative *Axin2* or *Id1* mRNA abundance (normalized by the amount of *Actb* mRNA) was then determined by RT-qPCR analysis. Data are means  $\pm$  s.d., n=4 independent experiments, one-way ANOVA followed by the Benjamini-Hochberg multiple-comparison test. Source data are provided as a Source Data file.



Supplementary Fig. 7

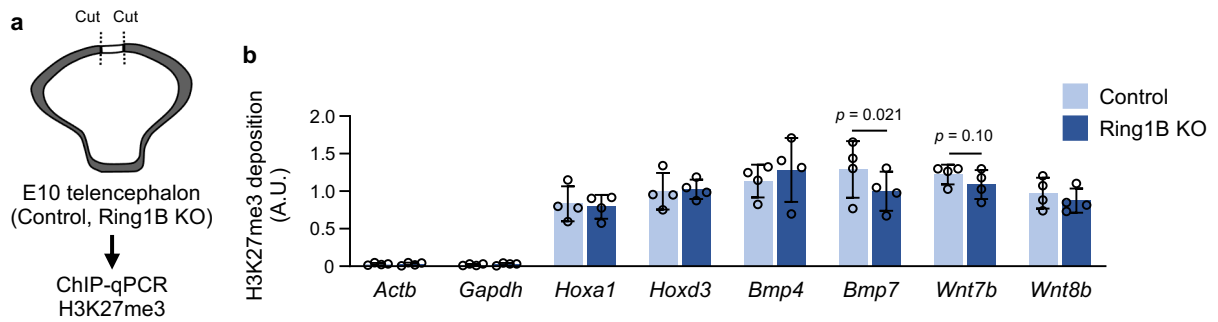

**Supplementary Fig. 7 Effects of *Ring1b* deletion on H3K27me3 deposition at BMP and Wnt ligand genes in the early-stage telencephalon.** **a** The telencephalon (outside of the dorsal midline) was isolated from control and Ring1B KO mice at E10 for ChIP-qPCR analysis with antibodies to H3K27me3. **b** ChIP-qPCR analysis of H3K27me3 deposition at the indicated gene promoters as in **a**. Data are expressed as percentage input normalized by the average value for the *Hoxa1* promoter in control mice, means  $\pm$  s.d., n=4 independent experiments with embryos from three litters, two-tailed Student's paired *t* test. Source data are provided as a Source Data file.

Supplementary Fig. 8

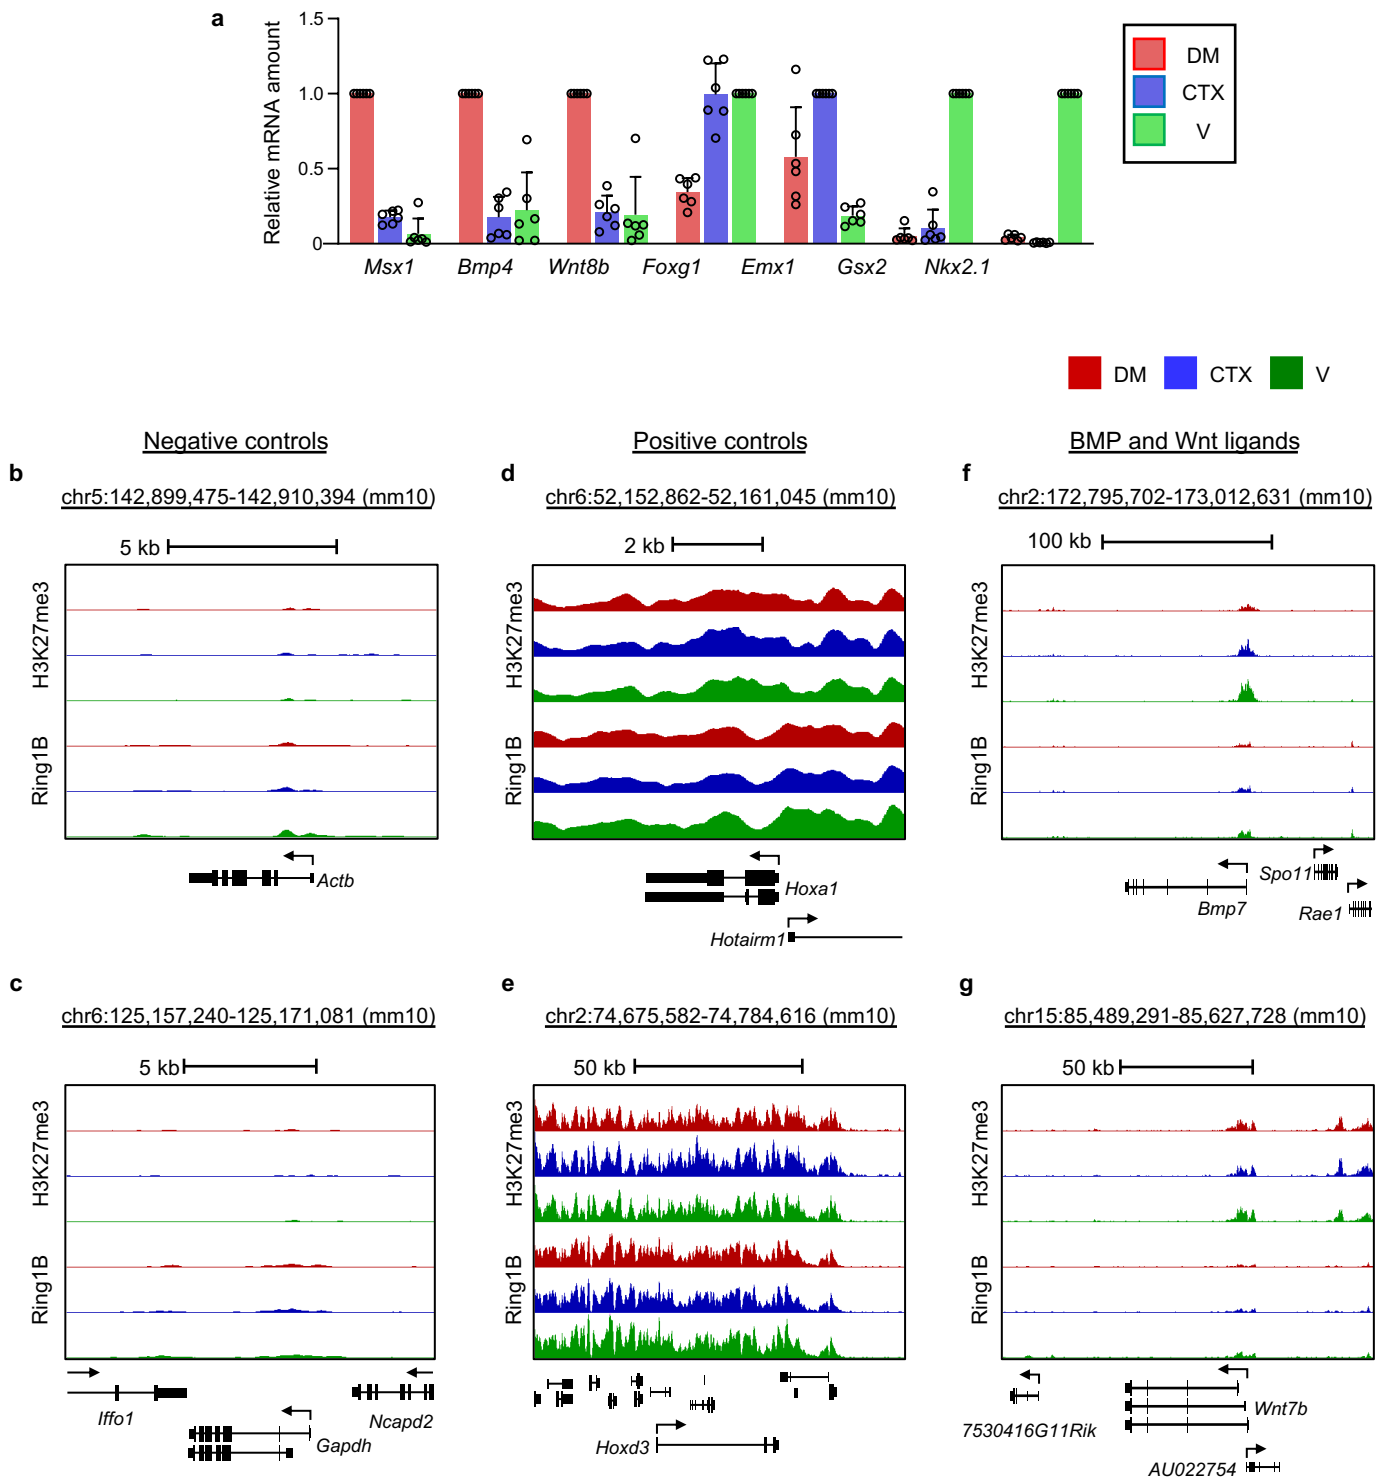

**Supplementary Fig. 8 CUT&Tag analysis of H3K27me3 deposition and Ring1B binding at gene loci in NPCs of telencephalic regions along the D-V axis.** **a** Confirmation of dissected telencephalic regions by analysis of regional marker gene expression. After dissection of the telencephalon at E11 into the dorsal midline (DM), CTX, and ventral (V) regions, CD133<sup>+</sup> NPCs were isolated as in Figure 9 and subjected to RT-qPCR analysis of the relative abundance of *Msx1*, *Bmp4*, and *Wnt8b* (DM markers); *Foxg1* (CTX and V marker); *Emx1* (CTX marker); and *Gsx2* and *Nkx2.1* (V markers) mRNAs (normalized by the amount of *Actb* mRNA). Data are means + s.d., n=6 independent experiments. **b–e** Positive and negative control loci for the CUT&Tag analysis performed in Fig. 9. The averages of normalized CUT&Tag signals for H3K27me3 and Ring1B around *Actb* (**b**) or *Gapdh* (**c**) as negative controls and around *Hoxa1* (**d**) or *Hoxd3* (**e**) as positive controls were determined for three (H3K27me3) or four (Ring1B) independent experiments and are visualized in the UCSC genome browser. The RefSeq gene models are shown at the bottom of each panel. **f, g**, The averages of normalized CUT&Tag signals for H3K27me3 and Ring1B around *Bmp7* (**f**) or *Wnt7b* (**g**) were determined for three (H3K27me3) or four (Ring1B) independent experiments and are visualized in the UCSC genome browser. The RefSeq gene models are shown at the bottom of each panel. Source data are provided as a Source Data file.

Supplementary Fig. 9

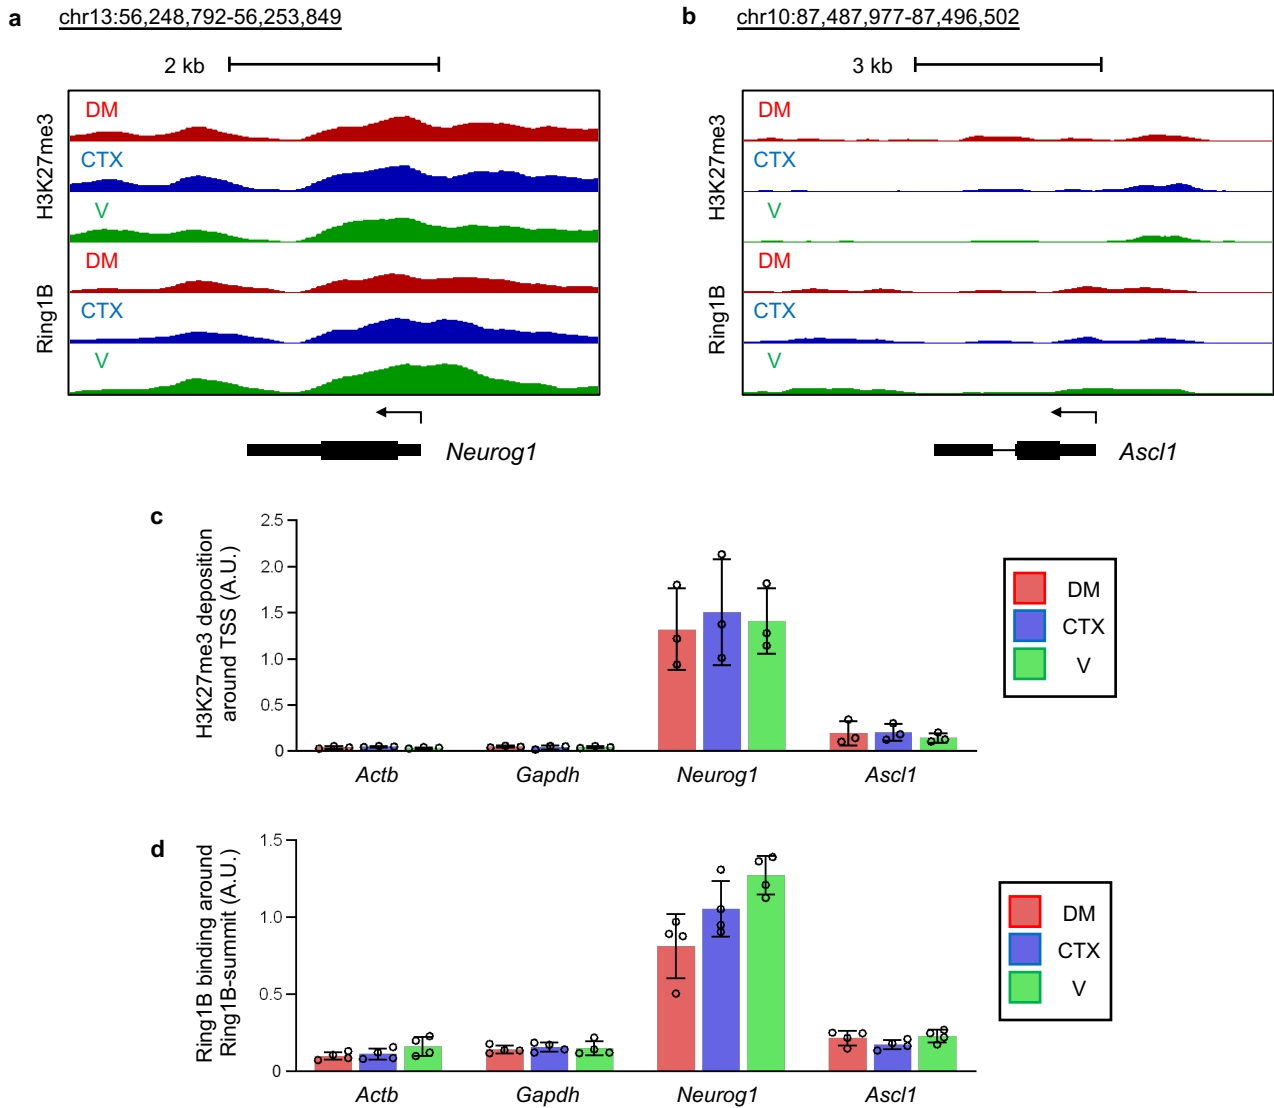

**Supplementary Fig. 9 CUT&Tag analysis of H3K27me3 deposition and Ring1B binding at *Neurog1* and *Ascl1* loci.** **a, b** The averages of normalized CUT&Tag signals for H3K27me3 and Ring1B around *Neurog1* (**a**) or *Ascl1* (**b**) were determined for three (H3K27me3) or four (Ring1B) independent experiments and are visualized in the UCSC genome browser. The RefSeq gene models are shown at the bottom of each panel. **c, d** Averages of normalized CUT&Tag signals for H3K27me3 around ( $\pm 1$  kbp) the transcription start site (TSS) (**c**) and Ring1B around ( $\pm 1$  kbp) the Ring1B summit (determined as the site in the gene body with the highest Ring1B signals across all samples) (**d**) of the indicated genes. Data are means  $\pm$  s.d. for biological triplicates (**c**) or quadruplicates (**d**). Source data are provided as a Source Data file.

Supplementary Fig. 9

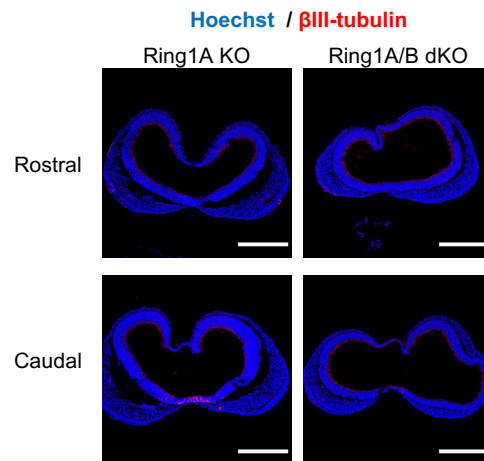

**Supplementary Fig. 10 Deletion of *Ring1b* in neural tissue with *Sox1-Cre* does not promote the onset of neurogenesis in the telencephalon.** Coronal sections of the brain of Ring1A KO or Ring1A/B dKO mice at E9 were subjected to immunohistofluorescence staining with antibodies to  $\beta$ III-tubulin. Nuclei were counterstained with Hoechst 33342. Representative images from n=3 embryos of each genotype are shown. Scale bars, 200  $\mu$ m. Note that a small number of cells were positive for the neuronal marker  $\beta$ III-tubulin in the Ring1A KO telencephalon—in particular, in the ventrocaudal part—but that *Ring1b* deletion did not increase the number of these cells.

Supplementary Fig. 10

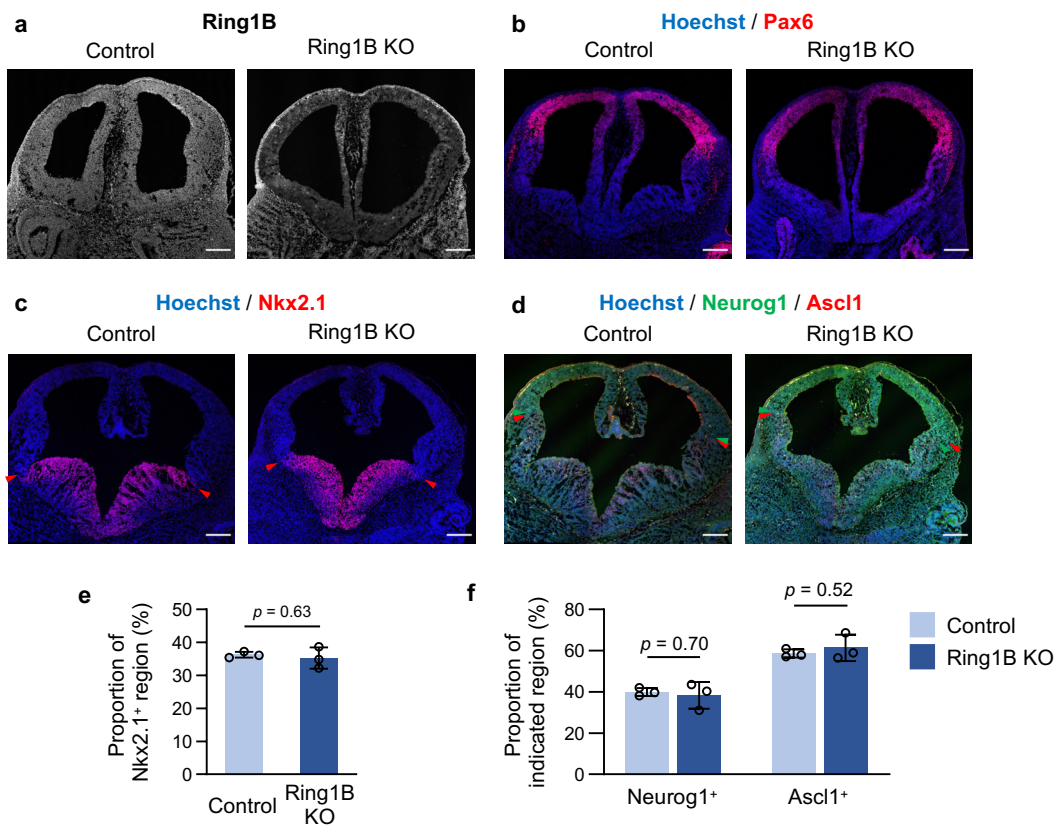

**Supplementary Fig. 11 Deletion of *Ring1b* in the telencephalon with *Foxg1-IRES-Cre* does not confer the dorsal-like expression pattern of region-specific TFs in the ventral telencephalon.** **a–d** Coronal sections of the brain of control (*Ring1b*<sup>fl<sub>ox</sub>/fl<sub>ox</sub></sup> or *Ring1b*<sup>fl<sub>ox</sub>/+</sup>) or Ring1B KO (*Ring1b*<sup>fl<sub>ox</sub>/fl<sub>ox</sub></sup>; *Foxg1-IRES-Cre*) mice at E11 were subjected to immunohistochemistry staining with antibodies to Ring1B (**a**), to Pax6 (**b**), to Nkx2.1 (**c**), or to Neurog1 and Ascl1 (**d**). Nuclei were counterstained with Hoechst 33342 in **b** through **d**. Scale bars, 200  $\mu$ m. Red arrowheads in **c** indicate the dorsal border of the Nkx2.1<sup>+</sup> region. Green and red arrowheads in **d** represent the dorsal and ventral borders of Ascl1<sup>+</sup> and Neurog1<sup>+</sup> regions, respectively. **e**, **f**, Quantification of immunostaining in images similar to those in **c** and **d**, respectively. The perimeter length of Nkx2.1<sup>+</sup> (**e**) or of Neurog1<sup>+</sup> or Ascl1<sup>+</sup> (**f**) regions as a proportion of total perimeter length for the telencephalic wall was determined. Data are means  $\pm$  s.d., n=3 embryos of each genotype. Note that the proportion of the dorsal (Neurog1<sup>+</sup>) and ventral (Nkx2.1<sup>+</sup> and Ascl1<sup>+</sup>) telencephalic regions did not differ significantly (two-tailed Student's unpaired *t* test) between these Ring1B-deficient mice and control mice at E11. Source data are provided as a Source Data file.

**Supplementary Table 1. Primer sequences for RT-qPCR**

| Gene           | Forward primer             | Reverse primer           |
|----------------|----------------------------|--------------------------|
| <i>β-actin</i> | AATAGTCATTCCAAGTATCCATGAAA | GCGACCATCCTCCTCTTAG      |
| <i>Nkx2.1</i>  | GATGAGTCCAAAGCACACG        | CTCCATGCCCACTTTCTTGTA    |
| <i>Gsx2</i>    | ACATACCTAAACCTGTCAGAGA     | CTTGCAGCTTGTGTGATTG      |
| <i>Emx1</i>    | GTTCCCAGAGGCCATGA          | TGGCCAAAGAAGCGATT        |
| <i>Bmp4</i>    | CTGAACTGAGTGCCATTTCC       | CTCTACCACCATCTCCTGATAA   |
| <i>Bmp7</i>    | CAGACACTGGTTCACCTTCAT      | TTAGAGCTGTCGTCGAAGTAG    |
| <i>Id1</i>     | TACGACATGAACGGCTGCTA       | TCTCCACCTTGCTCACTTT      |
| <i>Wnt7b</i>   | ACCAAACTTGCTGGACCAC        | ACGTGTTGCACTTGACGAAG     |
| <i>Wnt8b</i>   | CGTTCTTCTAGTCACTTGTGT      | GGTCCCAAGCAAACCTGGTATTTA |
| <i>Axin2</i>   | GGTCCCGGCTATGTCTTT         | CTCTCTCTGGAGCTGTT        |
| <i>Ptch1</i>   | TAAGAGTTTCAGCAATGTGAAGTATG | TGAAGCCAGTCTCTAAAGTAGT   |
| <i>Gli1</i>    | TGCCTGGAGAGACACAAT         | TGGGCACCTCATGTAGC        |
| <i>Shh</i>     | ATGTGTTCCGTTACCAGCGA       | ATATAACCTTGCTGCCGCT      |
| <i>Msx1</i>    | CTACGCAAGCACAAGACCAA       | GCAATAGACAGGTAAGTCTTC    |
| <i>Foxg1</i>   | TCCCTCTACTGGCCCAT          | GTGGTCCCGTTGTAACCTCAA    |

**Supplementary Table 2. Primer sequences for ChIP-qPCR**

| Gene           | Forward primer          | Reverse primer          |
|----------------|-------------------------|-------------------------|
| <i>β-actin</i> | CGGTTTGGACAAAGACCC      | AAAGCCGTATTAGGTCCATC    |
| <i>Gapdh</i>   | TGCAGTCCGTATTTATAGGAACC | CTTGAGCTAGGACTGGATAAGCA |
| <i>Hoxa1</i>   | CTGAACTGGCAAGAGGTGA     | CGACCACGCAGAGATTT       |
| <i>Hoxd3</i>   | ACCTATTTGCGGTCGTC       | CAAATTCGCCTGGGAAATCA    |
| <i>Bmp4</i>    | TGCTGCCCAAACCTGATG      | TTCAACGTTTGGGAATCCT     |
| <i>Bmp7</i>    | CAGCCTTCACCCAGAATG      | CACCCTAGGACTTCAAGAG     |
| <i>Wnt7b</i>   | GGCATCCAGGAGTCAGA       | CGCTATGGATGGAGCTAC      |
| <i>Wnt8b</i>   | ACTGTTTGGGATCGCTTAC     | ACAAGTGACTAGAAGAACGC    |

**Supplementary Table 3. A sequence for *Shh* ISH probe**

| Gene       | Probe target sequence              |
|------------|------------------------------------|
| <i>Shh</i> | NM_009170.3, 339-1652 (CDS 1-1314) |

**Supplementary Table 4. Antibodies and molecular probes for Immunohistofluorescence**

| <b>Antigen</b>                                     | <b>Host</b> | <b>Manufacturer</b>          | <b>Serial No.</b> | <b>Concentration</b> |
|----------------------------------------------------|-------------|------------------------------|-------------------|----------------------|
| Ascl1 (Mash1)                                      | Mouse       | BD Pharmagen                 | 556604            | 1:500                |
| Neurog1                                            | Goat        | Santa Cruz                   | sc-19231          | 1:200                |
| H2AK119ub                                          | Rabbit      | Cell Signaling<br>Technology | 8240S             | 1:1000               |
| Ring1B                                             | Rabbit      | Cell Signaling<br>Technology | 5694S             | 1:200                |
| Ring1B                                             | Mouse       | MBL                          | D139-3            | 1:500                |
| Cleaved Caspase-3                                  | Rabbit      | Cell Signaling<br>Technology | 9664S             | 1:1000               |
| Nkx2.1 (TTF1)                                      | Rabbit      | Abcam                        | ab76013           | 1:1000               |
| Gsx2 (Gsh2)                                        | Rabbit      | Millipore                    | ABN162            | 1:200                |
| Pax6                                               | Rabbit      | Millipore                    | AB2237            | 1:500                |
| Id1                                                | Rabbit      | Biocheck                     | BCH-1/37-2        | 1:200                |
| $\beta$ III-tubulin                                | Mouse       | BioLegend                    | 801202            | 1:1000               |
| Anti-goat IgG (H+L) antibody,<br>Alexa Fluor 633   | Donkey      | Thermo Fisher<br>Scientific  | A-21082           | 1:1000               |
| Anti-mouse IgG (H+L) antibody,<br>Alexa Fluor 546  | Donkey      | Thermo Fisher<br>Scientific  | A10036            | 1:1000               |
| Anti-mouse IgG (H+L) antibody,<br>Alexa Fluor 555  | Donkey      | Thermo Fisher<br>Scientific  | A-31750           | 1:1000               |
| Anti-mouse IgG (H+L) antibody,<br>Alexa Fluor 594  | Donkey      | Thermo Fisher<br>Scientific  | A-21203           | 1:1000               |
| Anti-mouse IgG (H+L) antibody,<br>Alexa Fluor 647  | Donkey      | Thermo Fisher<br>Scientific  | A-31571           | 1:1000               |
| Anti-mouse IgG (H+L) antibody,<br>Alexa Fluor 647  | Chicken     | Thermo Fisher<br>Scientific  | A-21463           | 1:1000               |
| Anti-rabbit IgG (H+L) antibody,<br>Alexa Fluor 488 | Donkey      | Thermo Fisher<br>Scientific  | A-21206           | 1:1000               |
| Anti-rabbit IgG (H+L) antibody,<br>Alexa Fluor 555 | Donkey      | Thermo Fisher<br>Scientific  | A-31572           | 1:1000               |
| Anti-rabbit IgG (H+L) antibody,<br>Alexa Fluor 594 | Donkey      | Thermo Fisher<br>Scientific  | A-21207           | 1:1000               |
| Anti-rabbit IgG (H+L) antibody,<br>Alexa Fluor 647 | Donkey      | Thermo Fisher<br>Scientific  | A-31573           | 1:1000               |
| Hoechst 33342                                      |             | Molecular Probes             |                   |                      |



**Supplementary Table 5. An antibody for FACS**

| <b>Antigen</b> | <b>Host</b> | <b>Manufacturer</b> | <b>Serial No.</b> | <b>Concentration</b> |
|----------------|-------------|---------------------|-------------------|----------------------|
| CD133-APC      | Rat         | Biologend           | 141208            | 1:400                |

**Supplementary Table 6. Antibodies for CHIP**

| <b>Antigen</b> | <b>Host</b> | <b>Manufacturer</b>          | <b>Serial No.</b> | <b>Concentration</b> |
|----------------|-------------|------------------------------|-------------------|----------------------|
| H3K27me3       | Mouse       | MBL                          | MABI0323          | 2 µg/sample          |
| Ring1B         | Rabbit      | Cell Signaling<br>Technology | 5694S             | 3 µg/sample          |

**Supplementary Table 7. Antibodies for CUT&Tag**

| <b>Antigen</b>                 | <b>Host</b> | <b>Manufacturer</b>          | <b>Serial No.</b> | <b>Concentration</b> |
|--------------------------------|-------------|------------------------------|-------------------|----------------------|
| H3K27me3                       | rabbit      | Cell Signaling<br>Technology | 9733S             | 1 µg/sample          |
| Ring1B                         | rabbit      | Cell Signaling<br>Technology | 5694S             | 1 µg/sample          |
| Anti-rabbit IgG (H&L) antibody | Guinea pig  | Rockland                     | 611-201-122       | 1 µg/sample          |
